# Supplementary material for: De novo transcriptome assembly of Pueraria montana var. lobata and Neustanthus phaseoloides for the development of eSSR and SNP markers: narrowing the US origin(s) of the invasive kudzu
Source: PubMed Central journal article supplement (PMC5989403; doi:10.1186/s12864-018-4798-3), 2018-06-05
Supplement: 12864_2018_4798_MOESM1_ESM.pdf [file 12864_2018_4798_MOESM1_ESM.pdf]

Supplemental Table S1. Trinity contig reads mapped back to the raw and cleaned reads

| <b>Accessions</b>                                            | <b>Raw</b>        |                   |                   | <b>Cleaned</b>    |                   |                   |
|--------------------------------------------------------------|-------------------|-------------------|-------------------|-------------------|-------------------|-------------------|
|                                                              | <b>CPP27</b>      | <b>Pmnk6</b>      | <b>CPP02</b>      | <b>CPP27</b>      | <b>Pmnk6</b>      | <b>CPP02</b>      |
| Total number of reads                                        | 279109            | 396022            | 423426            | 257015            | 281166            | 348529            |
| Total number of mapped reads<br>(overall alignment rate)     | 189579<br>(67.9%) | 271541<br>(68.6%) | 285849<br>(67.5%) | 209202<br>(81.4%) | 244107<br>(86.8%) | 287296<br>(82.4%) |
| Number of reads mapped once<br>(% of mapped reads)           | 129887<br>(68.5%) | 223624<br>(82.4%) | 222754<br>(77.9%) | 146361<br>(57.0%) | 198265<br>(70.5%) | 225010<br>(64.6%) |
| Number of reads mapped more than once<br>(% of mapped reads) | 59692<br>(31.5%)  | 47917<br>(17.6%)  | 63095<br>(22.1%)  | 62841<br>(24.5%)  | 45842<br>(16.3%)  | 62286<br>(17.9%)  |
| Total number of unmapped reads<br>(% of unmapped reads)      | 89530<br>(32.1%)  | 124481<br>(31.4%) | 137577<br>(32.5%) | 47813<br>(18.6%)  | 37059<br>(13.2%)  | 61233<br>(17.6%)  |
