# Supplementary material for: De novo transcriptome assembly of Pueraria montana var. lobata and Neustanthus phaseoloides for the development of eSSR and SNP markers: narrowing the US origin(s) of the invasive kudzu
Source: PubMed Central journal article supplement (PMC5989403; doi:10.1186/s12864-018-4798-3), 2018-06-05
Supplement: 12864_2018_4798_MOESM2_ESM.pdf [file 12864_2018_4798_MOESM2_ESM.pdf]

Supplemental Table S2. Contaminated reads as assessed by Kraken

|              | <b>Prokaryotes</b> | <b>Fungi</b>  |
|--------------|--------------------|---------------|
| <b>CPP27</b> | 1777 (0.50%)       | 6174 (2.64%)  |
| <b>Pmnk6</b> | 2209 (0.79%)       | 9021 (3.21%)  |
| <b>CPP02</b> | 4801 (1.32%)       | 12859 (3.53%) |
