# Supplementary material for: De novo transcriptome assembly of Pueraria montana var. lobata and Neustanthus phaseoloides for the development of eSSR and SNP markers: narrowing the US origin(s) of the invasive kudzu
Source: PubMed Central journal article supplement (PMC5989403; doi:10.1186/s12864-018-4798-3), 2018-06-05

Figure S3: CPP02 Top-Hit Species Distribution

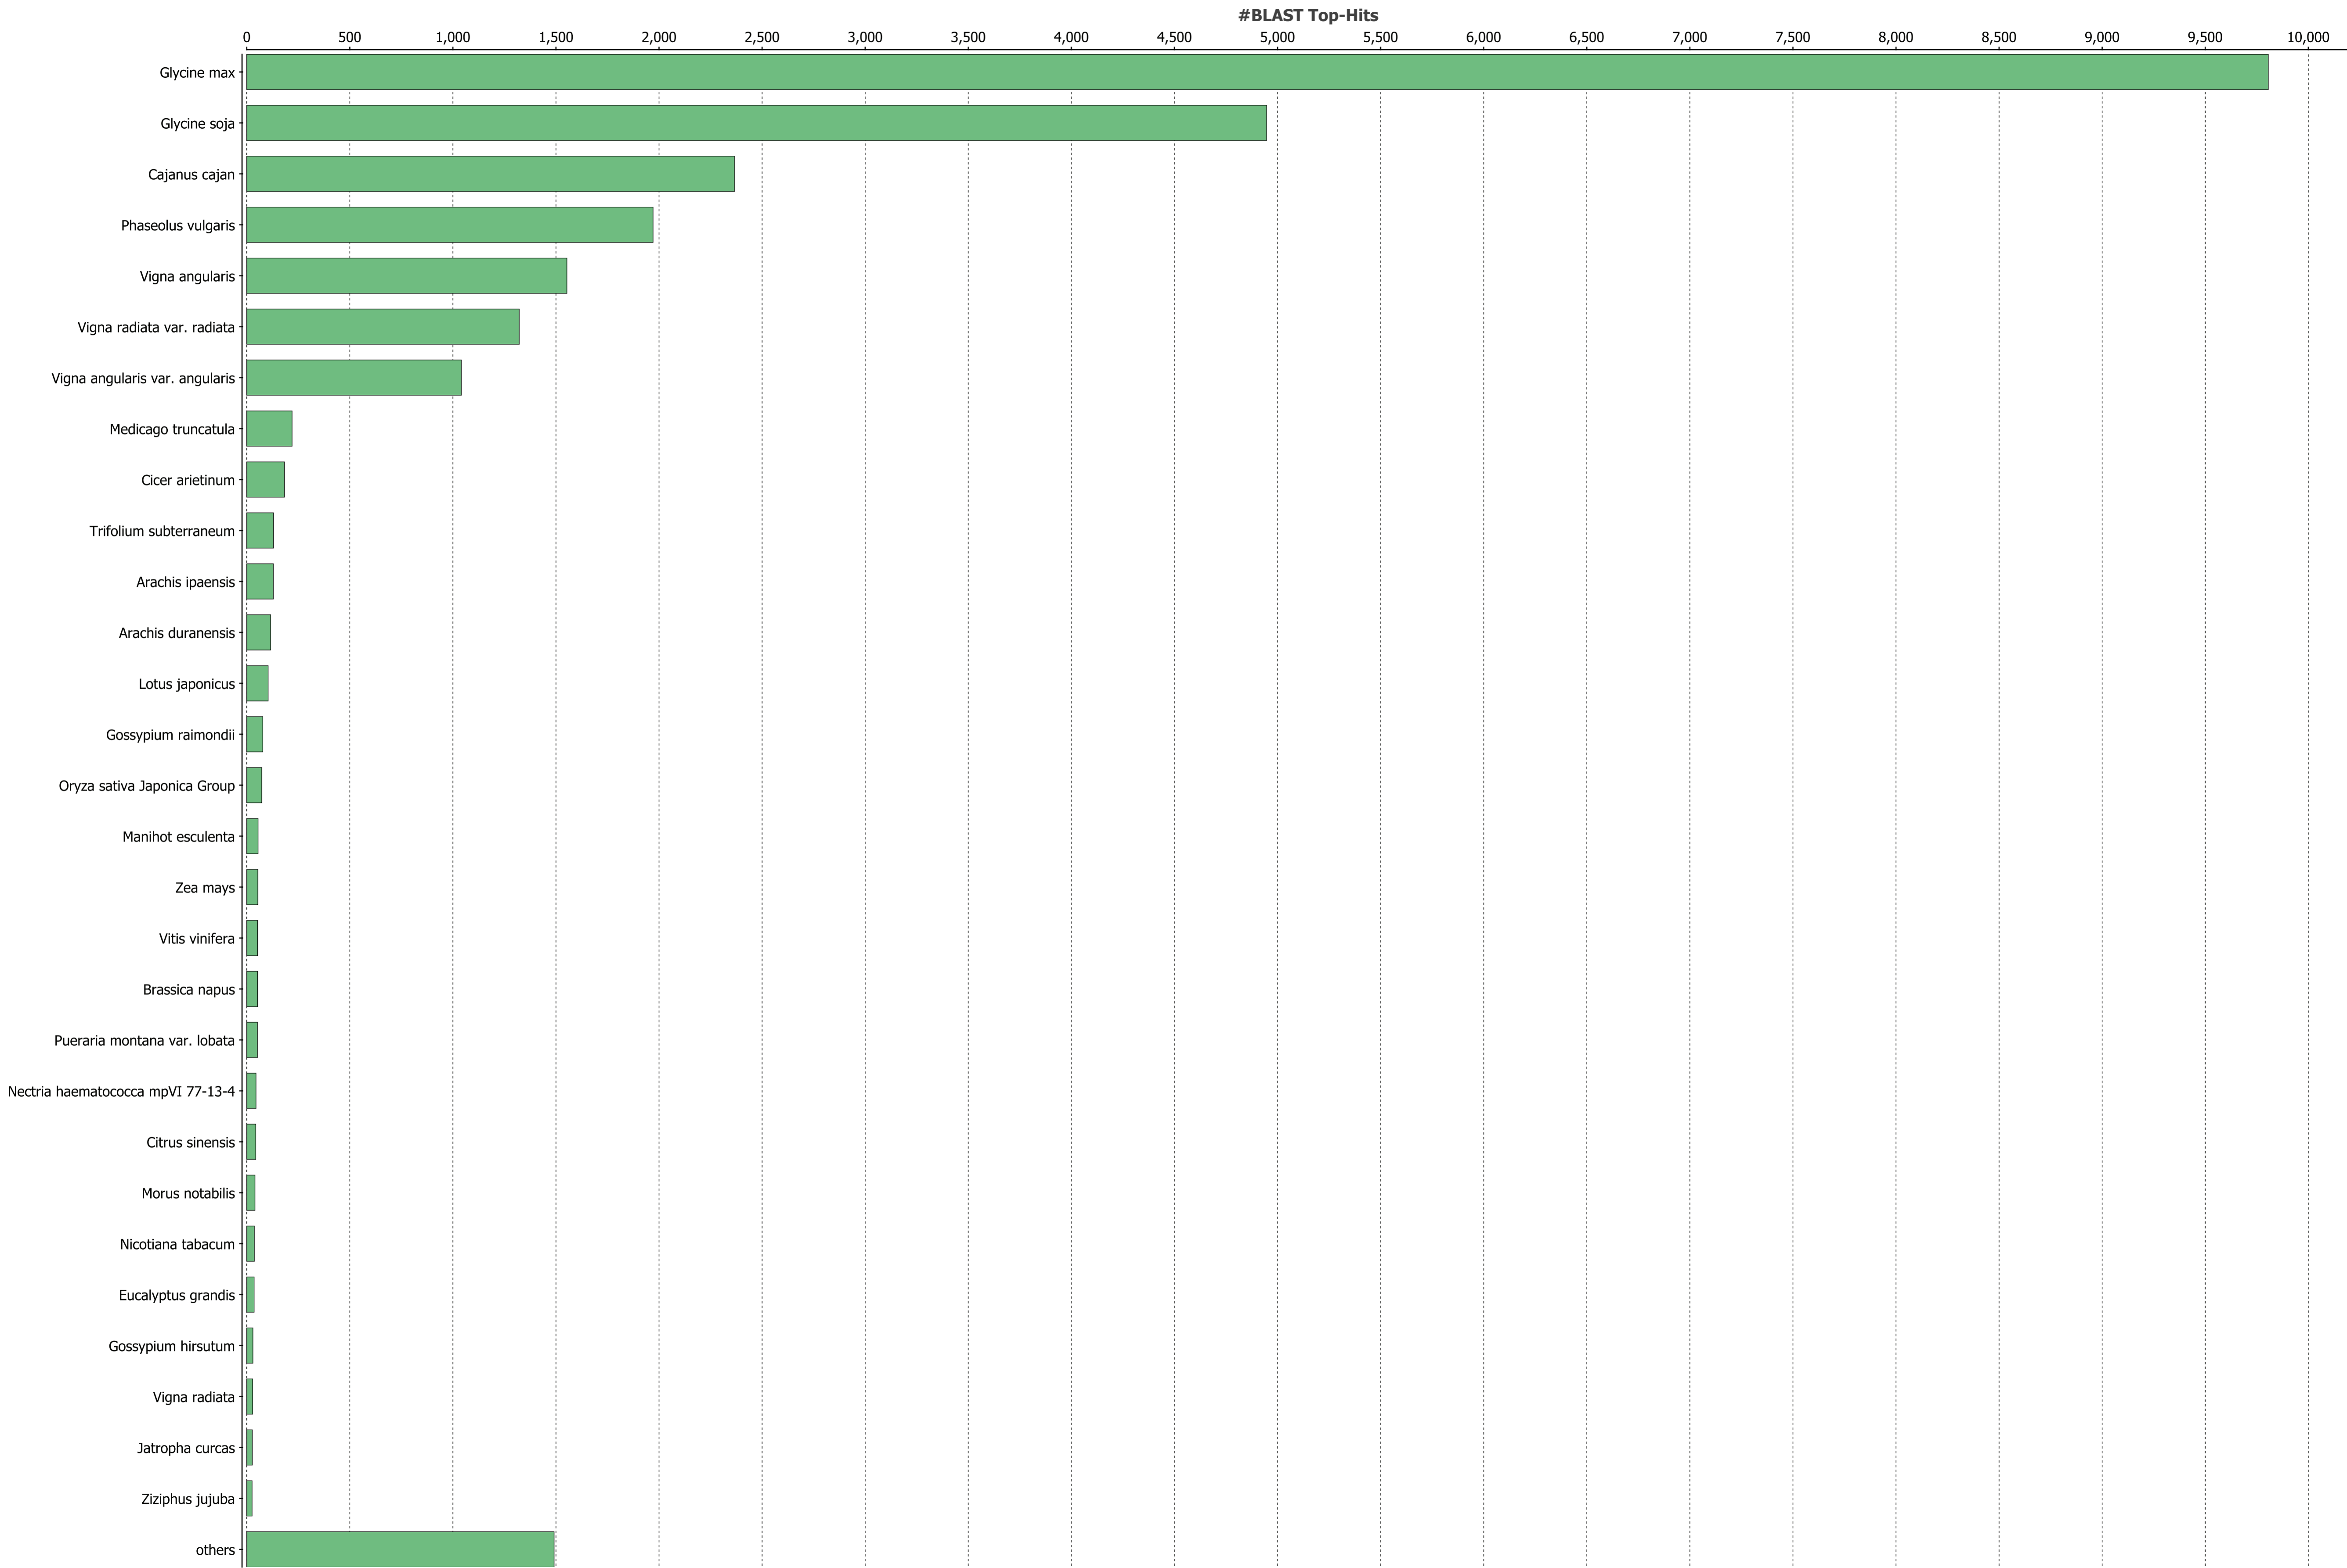

Supplement: 12864_2018_4798_MOESM5_ESM.pdf [file 12864_2018_4798_MOESM5_ESM.pdf]
