# Supplementary material for: De novo transcriptome assembly of Pueraria montana var. lobata and Neustanthus phaseoloides for the development of eSSR and SNP markers: narrowing the US origin(s) of the invasive kudzu
Source: PubMed Central journal article supplement (PMC5989403; doi:10.1186/s12864-018-4798-3), 2018-06-05
Supplement: 12864_2018_4798_MOESM11_ESM.pdf [file 12864_2018_4798_MOESM11_ESM.pdf]

Table S3. Thirty primer pairs tested for polymorphic amplification in *Pueraria montana*

| Locus | Primers                                                         | Motif                | Gene or Reference                                       | Status            |
|-------|-----------------------------------------------------------------|----------------------|---------------------------------------------------------|-------------------|
| PP1   | F TCGATCTCTGGTGCACA<br>R CCCACCTTACAGCCCTATC                    | (GTT) <sub>4,9</sub> | Arginine decarboxylase                                  | No amplification* |
| PP2   | F <b>ATGCCGGGATCTTTGAAAG</b><br>R <b>CAAATTGGCCCTGTCCCAAT</b>   | (AAC) <sub>5,6</sub> | Calcium-dependent protein kinase                        | Polymorphic*      |
| PP3   | F AATGTGGGAGAGCTGCAAGAT<br>R TCTTGAGCAGGCTCCGAAC                | (AAG) <sub>5</sub>   | WEB family protein<br>At3g02930                         | Monomorphic*      |
| PP4   | F <b>CATGCCACGTGCTTCATAG</b><br>R <b>CTCTCAGATCCAGGCCCAAA</b>   | (TGC) <sub>5</sub>   | Dehydration responsive element-binding protein          | Polymorphic*      |
| PP5   | F TCGCGGTTGTATTGCATTC<br>R AAGTTTCACGGATCTCTCGC                 | (CTT) <sub>4</sub>   | 40S ribosomal protein S30                               | Monomorphic*      |
| PP6   | F TCTTCCATGGCTACGATCG<br>R AGGAGTCCGAGCTAGTGATG                 | (GCT) <sub>4</sub>   | Ras-related protein RHN1-like                           | No amplification* |
| PP7   | F TTTGCGAAGATGTGGAAGCC<br>R TCAATCCTCACAGCCGTACC                | (CGG) <sub>4</sub>   | Mitochondrial Rho GTPase 1-like                         | No amplification* |
| PP8   | F TCTGCAGGCCTAGATTTGGG<br>R GGCCACATTTCCAGAATGG                 | (GTG) <sub>5</sub>   | Chloride channel protein CLC-b-like                     | Monomorphic*      |
| PP9   | F TCACCCTCAAGAAGACGAGC<br>R GATTGGCAGGACTTTGTGGG                | (AGC) <sub>4</sub>   | Plasma membrane ATPase 4-like                           | Wrong Band Size   |
| PP10  | F <b>GGCATGTAGATCCAGCTAAA</b><br>R <b>TTGACAGATTTCTGATTCTGG</b> | (GGT) <sub>4,6</sub> | RNA-binding protein cabeza-like                         | Polymorphic*      |
| PP11  | F TCAGCTGGTACAGAATCTCGA<br>R GCTCACGCTCAAGGTCATTC               | (GCT) <sub>4</sub>   | Serine/arginine-rich splicing SR45-like                 | No amplification  |
| PP12  | F CAGCTGCCAAGGGATCAATG<br>R TGACCCAGATTTTTGGAAGCT               | (AGC) <sub>4</sub>   | N-acetylglucosaminyl-transferase SEC                    | Multiple Bands*   |
| PP13  | F <b>GATTGAGCAGGCACGAGAAC</b><br>R <b>CAGTAGCAGGCATGTGTGG</b>   | (GCT) <sub>4</sub>   | Signal recognition particle subunit SRP72-like          | Polymorphic*      |
| PP14  | F CGCCGGATTATGTCATCGAG<br>R TCAACGCAGAGTACATGGGG                | (CTT) <sub>6,7</sub> | Serine/theonine-protein phosphatase PP1 isozyme 4       | No amplification* |
| PP15  | F GAACCAACCAAGGCTCCATG<br>R CTGAGGTGAGTGTGGATGAA                | (AGC) <sub>4</sub>   | SSUH2 homolog                                           | Wrong Band Size   |
| PP16  | F ATCACCCAAGATGTGGCCAA<br>F ACAATGGTCCCTTGTGTCCC                | (GCT) <sub>5</sub>   | Mediator of RNA polymerase II transcription subunit 15a | No amplification  |
| PP17  | R CGGAAGAGTGTAGTATGGG<br>F ACTGGCCACTTGAGTAGGTG                 | (CCG) <sub>4</sub>   | Transcription factor MYB1R1                             | Multiple Bands*   |
| PL1   | R <b>TGTAAGCGTTCGTTCTGG</b><br>F <b>TCAACCTGGTCTCTGAC</b>       | (CTT) <sub>7</sub>   | 1,2-alpha-mannosidase                                   | Polymorphic*      |
| PL2   | R AGTGCTAGGGTTCGGTCAAG<br>F CGCTTTCATCCAAGTTCCC                 | (CAC) <sub>10</sub>  | Uncharacterized<br>LOC100787224                         | Multiple Bands*   |
| PL3   | R TCAGTTTCCGGTACAGGTGG<br>F GATGCGGCAACCTTCCATC                 | (GTT) <sub>9</sub>   | U1 small nuclear ribonucleoprotein 70 kDa               | Multiple Bands*   |
| PL4   | R GTCTCGGCATGCAATCTGAC<br>F ACTGTGAAAGATGTGGTGGC                | (ATC) <sub>9</sub>   | Uncharacterized<br>LOC100781552                         | Wrong Band Size   |
| PL5   | R CATGCCCTCATCTTCTTCC<br>F TGGCCAAATTCAGGTGACAC                 | (TCG) <sub>10</sub>  | Uncharacterized<br>LOC100527242                         | No amplification* |
| PL6   | R CCATGAACCTGCTTGACGAC<br>F ACATGAAGAAGAAAGCGGCG                | (TGG) <sub>5</sub>   | Uncharacterized<br>LOC100797677                         | Multiple Bands*   |
| PL7   | R <b>AGTGGCCTTGCTCTTCTCC</b><br>F <b>GTGTCATCTCAGCACGTTGG</b>   | (TTC) <sub>8</sub>   | Sphingolipid transporter spinster homolog 2             | Polymorphic*      |
| PL8   | R AAGGCCACTACTACCACAGC<br>F CTTGCTGAATGGCCGACTTG                | (GAA) <sub>8</sub>   | Mediator of RNA polymerase II transcription subunit 26b | Multiple Bands    |
| PL9   | R GCACCACCATTAACCAAGTCC<br>F ATTCAGCGTCATCAATCGGC               | (CAA) <sub>9</sub>   | Rop guanine nucleotide exchange factor 5-like           | No amplification  |
| PL10  | R TCACTTCATTCACAGCAGCG<br>F GATGGTCTCTGATCTCGTCCG               | (CCG) <sub>6</sub>   | Heterogeneous nuclear ribonucleoprotein Q-like          | No amplification  |
| PL11  | F <b>TGGCATCATCTTCAACCAC</b><br>R <b>ATTCGGGAATAGTGGGTGGG</b>   | (ACC) <sub>7</sub>   | BRASSINAZOLE-RESISTANT 1-like                           | Polymorphic*      |
| PL12  | F TGTTGTTGTTGCCAAGGGAG<br>R TCTCAGCTATTTCTCGGCC                 | (GAT) <sub>7</sub>   | Signal recognition particle receptor subunit alpha-like | Wrong Band Size   |
| PL13  | F TCGATGACTACAGCTGGACG<br>R TTACCCATTCTCCACCTCC                 | (GAA) <sub>7</sub>   | Actin-related protein 3                                 | Multiple Bands*   |

\* primers run through the Culley et al., 2013 method; **Bold** are primers were used in eSSR analyses for this study.
