# Supplementary material for: De novo transcriptome assembly of Pueraria montana var. lobata and Neustanthus phaseoloides for the development of eSSR and SNP markers: narrowing the US origin(s) of the invasive kudzu
Source: PubMed Central journal article supplement (PMC5989403; doi:10.1186/s12864-018-4798-3), 2018-06-05

Figure S4. Delta K of STRUCTURE run showing K=3 as optimal number of genetic clusters.

$$\text{DeltaK} = \text{mean}(|L''(K)|) / \text{sd}(L(K))$$

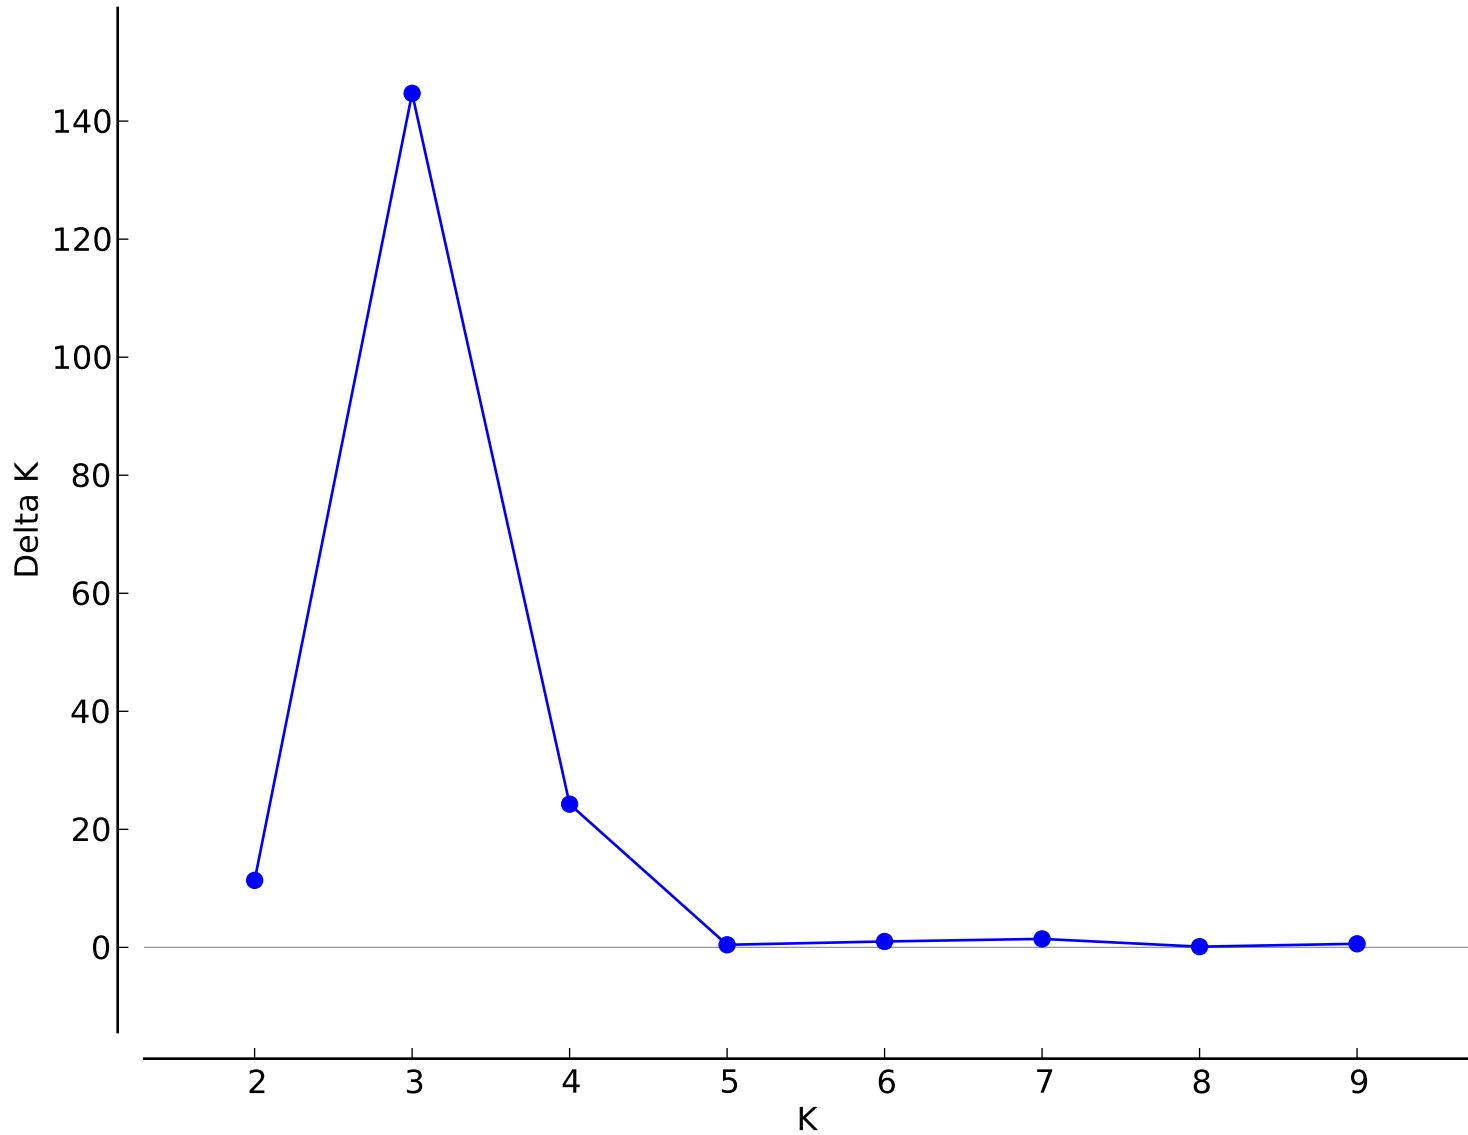

Supplement: 12864_2018_4798_MOESM12_ESM.pdf [file 12864_2018_4798_MOESM12_ESM.pdf]
