# Supplementary material for: De novo transcriptome assembly of Pueraria montana var. lobata and Neustanthus phaseoloides for the development of eSSR and SNP markers: narrowing the US origin(s) of the invasive kudzu
Source: PubMed Central journal article supplement (PMC5989403; doi:10.1186/s12864-018-4798-3), 2018-06-05
Supplement: 12864_2018_4798_MOESM13_ESM.pdf [file 12864_2018_4798_MOESM13_ESM.pdf]

Table S4. Allele table for *Pueraria* sub-populations

| Locus        | US 1 | US 2 | US 3 | CN 1 | CN 2 | CN 3 | JP 1 | JP 2 | JP 3 | TH   | Mean | SD   | Total |
|--------------|------|------|------|------|------|------|------|------|------|------|------|------|-------|
| <b>PP2</b>   | 6    | 4    | 4    | 3    | 4    | 6    | 4    | 5    | 5    | 4    | 4.50 | 0.97 | 9     |
| <b>PP4</b>   | 4    | 3    | 2    | 3    | 2    | 4    | 4    | 2    | 5    | 3    | 3.20 | 1.03 | 9     |
| <b>PP10</b>  | 4    | 3    | 3    | 2    | 3    | 5    | 2    | 3    | 4    | 3    | 3.20 | 0.92 | 8     |
| <b>PP13</b>  | 1    | 2    | 2    | 3    | 4    | 6    | 3    | 1    | 3    | 2    | 2.70 | 1.49 | 7     |
| <b>PL1</b>   | 3    | 3    | 1    | 1    | 2    | 3    | 1    | 2    | 1    | 4    | 2.10 | 1.10 | 9     |
| <b>PL7</b>   | 4    | 4    | 6    | 4    | 5    | 8    | 4    | 7    | 6    | 3    | 5.10 | 1.60 | 15    |
| <b>PL11</b>  | 4    | 4    | 3    | 4    | 4    | 4    | 3    | 2    | 2    | 1    | 3.10 | 1.10 | 7     |
| <b>Mean</b>  | 3.71 | 3.29 | 3.00 | 2.86 | 3.43 | 5.14 | 3.00 | 3.14 | 3.71 | 2.86 |      |      |       |
| <b>SD</b>    | 1.50 | 0.76 | 1.63 | 1.07 | 1.13 | 1.68 | 1.15 | 2.12 | 1.80 | 1.07 |      |      |       |
| <b>Total</b> | 26   | 23   | 21   | 20   | 24   | 36   | 21   | 22   | 26   | 20   |      |      | 64    |

US = United States; CN = China; JP = Japan; TH = Thailand; SD = Standard deviation
