# Supplementary material for: De novo transcriptome assembly of Pueraria montana var. lobata and Neustanthus phaseoloides for the development of eSSR and SNP markers: narrowing the US origin(s) of the invasive kudzu
Source: PubMed Central journal article supplement (PMC5989403; doi:10.1186/s12864-018-4798-3), 2018-06-05
Supplement: 12864_2018_4798_MOESM14_ESM.pdf [file 12864_2018_4798_MOESM14_ESM.pdf]

Table S5. Plant Material for eSSR validation and population genetics. Photo vouchers available from corresponding author. All other vouchers held at U.S. National Herbarium (US). US: United States; CN: China; JP: Japan.

| Species                                       | Pop  | Country  | State/Province/Island | Voucher                  | Accession | Latitude   | Longitude  |
|-----------------------------------------------|------|----------|-----------------------|--------------------------|-----------|------------|------------|
| <i>Pueraria montana</i> var. <i>lobata</i>    | CN 1 | China    | Liaoning              | A.N. Egan 13-001         | E1840     | 41.0207667 | 123.107317 |
| <i>Pueraria montana</i> var. <i>lobata</i>    | CN 1 | China    | Liaoning              | A.N. Egan 13-023         | E2032     | 41.2402167 | 124.259617 |
| <i>Pueraria montana</i> var. <i>lobata</i>    | CN 1 | China    | Shaanxi               | A.N. Egan 13-055         | E1881     | 34.28175   | 107.04765  |
| <i>Pueraria montana</i> var. <i>lobata</i>    | CN 1 | China    | Shaanxi               | A.N. Egan 13-146         | E2102     | 32.6511667 | 108.96645  |
| <i>Pueraria montana</i> var. <i>lobata</i>    | CN 1 | China    | Shaanxi               | A.N. Egan 13-176         | E2131     | 33.8057667 | 108.9822   |
| <i>Pueraria montana</i> var. <i>lobata</i>    | CN 2 | China    | Anhui                 | A.N. Egan 13-314         | E2222     | 29.88745   | 118.281383 |
| <i>Pueraria montana</i> var. <i>lobata</i>    | CN 2 | China    | Hunan                 | A.N. Egan 13-283 (photo) | E2192     | 29.3327833 | 110.425417 |
| <i>Pueraria montana</i> var. <i>thomsonii</i> | CN 2 | China    | Hunan                 | A.N. Egan 13-294         | E2202     | 28.7617333 | 111.958817 |
| <i>Pueraria montana</i> var. <i>thomsonii</i> | CN 2 | China    | Hunan                 | A.N. Egan 13-197 (photo) | E1900     | 26.5411    | 110.428133 |
| <i>Pueraria montana</i> var. <i>thomsonii</i> | CN 2 | China    | Hunan                 | A.N. Egan 13-241         | E2151     | 27.432683  | 109.952917 |
| <i>Pueraria montana</i> var. <i>lobata</i>    | CN 2 | China    | Jiangxi               | A.N. Egan 13-419         | E2137     | 29.5219667 | 115.89175  |
| <i>Pueraria montana</i> var. <i>thomsonii</i> | CN 2 | China    | Jiangxi               | A.N. Egan 13-379         | E2279     | 28.2224833 | 116.790667 |
| <i>Pueraria montana</i> var. <i>thomsonii</i> | CN 2 | China    | Zhejiang              | A.N. Egan 13-338         | E2673     | 28.6116667 | 120.040083 |
| <i>Pueraria montana</i> var. <i>lobata</i>    | CN 3 | China    | Guizhou               | A.N. Egan 12-284         | E2977     | 25.08139   | 104.92944  |
| <i>Pueraria montana</i> var. <i>lobata</i>    | CN 3 | China    | Sichuan               | A.N. Egan 12-200         | E2691     | 30.03287   | 102.8138   |
| <i>Pueraria montana</i> var. <i>lobata</i>    | CN 3 | China    | Sichuan               | A.N. Egan 12-209         | E2919     | 27.05593   | 102.17394  |
| <i>Pueraria montana</i> var. <i>lobata</i>    | CN 3 | China    | Sichuan               | A.N. Egan 12-203         | E2951     | 28.26297   | 102.18277  |
| <i>Pueraria edulis</i>                        | CN 3 | China    | Yunnan                | A.N. Egan 12-242         | E2799     | 24.2292    | 102.31336  |
| <i>Pueraria montana</i> var. <i>lobata</i>    | CN 3 | China    | Yunnan                | A.N. Egan 12-227         | E2773     | 27.00793   | 100.075    |
| <i>Pueraria montana</i> var. <i>lobata</i>    | CN 3 | China    | Yunnan                | A.N. Egan 12-238         | E2906     | 24.97381   | 102.30247  |
| <i>Pueraria montana</i> var. <i>thomsonii</i> | CN 3 | China    | Yunnan                | A.N. Egan 12-249         | E2950     | 22.36077   | 100.97531  |
| <i>Pueraria montana</i> var. <i>lobata</i>    | JP 1 | Japan    | Hokkaido              | A.N. Egan 13-552 (photo) | E2369     | 42.14917   | 143.00028  |
| <i>Pueraria montana</i> var. <i>lobata</i>    | JP 1 | Japan    | Hokkaido              | A.N. Egan 13-556 (photo) | E2373     | 42.1498333 | 142.804667 |
| <i>Pueraria montana</i> var. <i>lobata</i>    | JP 1 | Japan    | Hokkaido              | A.N. Egan 13-562 (photo) | E2378     | 43.5943333 | 141.513333 |
| <i>Pueraria montana</i> var. <i>lobata</i>    | JP 1 | Japan    | Hokkaido              | A.N. Egan 13-575 (photo) | E2391     | 43.417     | 141.429833 |
| <i>Pueraria montana</i> var. <i>lobata</i>    | JP 1 | Japan    | Hokkaido              | A.N. Egan 13-585 (photo) | E2401     | 42.40611   | 141.09917  |
| <i>Pueraria montana</i> var. <i>lobata</i>    | JP 1 | Japan    | Hokkaido              | A.N. Egan 13-595 (photo) | E2411     | 42.5216667 | 140.7845   |
| <i>Pueraria montana</i> var. <i>lobata</i>    | JP 1 | Japan    | Hokkaido              | A.N. Egan 13-596 (photo) | E2412     | 42.5481667 | 140.765333 |
| <i>Pueraria montana</i> var. <i>lobata</i>    | JP 2 | Japan    | Honshu                | A.N. Egan 13-602 (photo) | E2802     | 35.14361   | 139.98611  |
| <i>Pueraria montana</i> var. <i>lobata</i>    | JP 2 | Japan    | Honshu                | A.N. Egan 13-615 (photo) | E2815     | 35.1331667 | 139.951333 |
| <i>Pueraria montana</i> var. <i>lobata</i>    | JP 2 | Japan    | Honshu                | A.N. Egan 13-623 (photo) | E2823     | 35.214     | 139.064333 |
| <i>Pueraria montana</i> var. <i>lobata</i>    | JP 2 | Japan    | Honshu                | A.N. Egan 13-632 (photo) | E2832     | 35.2176667 | 138.925833 |
| <i>Pueraria montana</i> var. <i>lobata</i>    | JP 2 | Japan    | Honshu                | A.N. Egan 13-640 (photo) | E2840     | 34.94639   | 138.33444  |
| <i>Pueraria montana</i> var. <i>lobata</i>    | JP 2 | Japan    | Honshu                | A.N. Egan 13-653 (photo) | E2853     | 35.0653333 | 138.109667 |
| <i>Pueraria montana</i> var. <i>lobata</i>    | JP 2 | Japan    | Honshu                | A.N. Egan 13-654 (photo) | E2854     | 36.4505    | 139.274    |
| <i>Pueraria montana</i> var. <i>lobata</i>    | JP 2 | Japan    | Honshu                | A.N. Egan 13-672 (photo) | E2872     | 36.8575    | 139.5      |
| <i>Pueraria montana</i> var. <i>lobata</i>    | JP 3 | Japan    | Kyushu                | A.N. Egan 13-490 (photo) | E1990     | 33.453667  | 130.1997   |
| <i>Pueraria montana</i> var. <i>lobata</i>    | JP 3 | Japan    | Kyushu                | A.N. Egan 13-493 (photo) | E1993     | 33.432     | 130.203167 |
| <i>Pueraria montana</i> var. <i>lobata</i>    | JP 3 | Japan    | Kyushu                | A.N. Egan 13-513 (photo) | E2334     | 32.6853333 | 131.325667 |
| <i>Pueraria montana</i> var. <i>lobata</i>    | JP 3 | Japan    | Kyushu                | A.N. Egan 13-530 (photo) | E2350     | 32.66694   | 131.75     |
| <i>Pueraria montana</i> var. <i>lobata</i>    | JP 3 | Japan    | Kyushu                | A.N. Egan 13-539 (photo) | E2356     | 31.8835    | 130.9765   |
| <i>Pueraria montana</i> var. <i>lobata</i>    | JP 3 | Japan    | Kyushu                | A.N. Egan 13-550 (photo) | E2367     | 31.8741667 | 130.835    |
| <i>Pueraria montana</i> var. <i>lobata</i>    | JP 3 | Japan    | Kyushu                | A.N. Egan 13-495 (photo) | E2682     | 33.27306   | 131.23194  |
| <i>Pueraria montana</i> var. <i>montana</i>   | TH   | Thailand | Chiang Mai            | A.N. Egan 13-803         | E2519     | 19.3402778 | 98.8730556 |
| <i>Pueraria montana</i> var. <i>montana</i>   | TH   | Thailand | Chiang Mai            | A.N. Egan 13-815         | E2531     | 19.4036111 | 98.9225    |
| <i>Pueraria montana</i> var. <i>thomsonii</i> | TH   | Thailand | Lamphun               | A.N. Egan 13-784         | E2031     | 18.4941667 | 99.0780556 |
| <i>Pueraria montana</i> var. <i>montana</i>   | TH   | Thailand | Nakhon Ratchasima     | A.N. Egan 13-836         | E2552     | 14.5427778 | 101.351389 |
| <i>Pueraria montana</i> var. <i>montana</i>   | TH   | Thailand | Nan                   | A.N. Egan 13-752         | E2028     | 19.2038889 | 101.063889 |
| <i>Pueraria montana</i> var. <i>thomsonii</i> | TH   | Thailand | Phrae                 | A.N. Egan 13-746         | E2026     | 18.3613889 | 100.365278 |
| <i>Pueraria montana</i> var. <i>montana</i>   | TH   | Thailand | Uttaradit             | A.N. Egan 13-736         | E2468     | 17.7825    | 100.117778 |
| <i>Pueraria montana</i> var. <i>lobata</i>    | US 1 | USA      | Indiana               | A.N. Egan 12-131         | E1317     | 38.92729   | -86.53724  |
| <i>Pueraria montana</i> var. <i>lobata</i>    | US 1 | USA      | Indiana               | A.N. Egan 12-133         | E3025     | 37.99589   | -87.60736  |
| <i>Pueraria montana</i> var. <i>lobata</i>    | US 1 | USA      | Missouri              | A.N. Egan 12-143         | E1773     | 34.64078   | -89.29037  |

|                                            |      |     |                |                  |       |          |           |
|--------------------------------------------|------|-----|----------------|------------------|-------|----------|-----------|
| <i>Pueraria montana</i> var. <i>lobata</i> | US 1 | USA | Missouri       | A.N. Egan 12-136 | E1782 | 37.58647 | -90.46377 |
| <i>Pueraria montana</i> var. <i>lobata</i> | US 1 | USA | Missouri       | A.N. Egan 12-135 | E1783 | 38.40836 | -90.49232 |
| <i>Pueraria montana</i> var. <i>lobata</i> | US 1 | USA | Missouri       | A.N. Egan 12-139 | E1789 | 36.80336 | -89.94632 |
| <i>Pueraria montana</i> var. <i>lobata</i> | US 1 | USA | Missouri       | A.N. Egan 12-134 | E1791 | 38.63948 | -90.67005 |
| <i>Pueraria montana</i> var. <i>lobata</i> | US 1 | USA | Missouri       | A.N. Egan 12-138 | E1781 | 37.18877 | -90.47495 |
| <i>Pueraria montana</i> var. <i>lobata</i> | US 1 | USA | West Virginia  | A.N. Egan 12-130 | E1316 | 39.31855 | -80.03288 |
| <i>Pueraria montana</i> var. <i>lobata</i> | US 2 | USA | Alabama        | A.N. Egan 12-59  | E1019 | 33.53013 | -86.70533 |
| <i>Pueraria montana</i> var. <i>lobata</i> | US 2 | USA | Alabama        | A.N. Egan 12-62  | E1022 | 33.64488 | -85.82055 |
| <i>Pueraria montana</i> var. <i>lobata</i> | US 2 | USA | Florida        | A.N. Egan 12-14  | E974  | 30.47605 | -84.18287 |
| <i>Pueraria montana</i> var. <i>lobata</i> | US 2 | USA | Georgia        | A.N. Egan 12-79  | E1039 | 33.75177 | -84.71908 |
| <i>Pueraria montana</i> var. <i>lobata</i> | US 2 | USA | Georgia        | A.N. Egan 12-89  | E1044 | 33.9673  | -83.82018 |
| <i>Pueraria montana</i> var. <i>lobata</i> | US 2 | USA | Georgia        | A.N. Egan 12-103 | E1058 | 33.94568 | -83.35388 |
| <i>Pueraria montana</i> var. <i>lobata</i> | US 2 | USA | North Carolina | A.N. Egan 11-125 | E1768 | 35.49912 | -83.31294 |
| <i>Pueraria montana</i> var. <i>lobata</i> | US 2 | USA | North Carolina | A.N. Egan 11-108 | E1770 | 35.43056 | -82.24863 |
| <i>Pueraria montana</i> var. <i>lobata</i> | US 2 | USA | North Carolina | A.N. Egan 11-86  | E1786 | 35.17399 | -79.41421 |
| <i>Pueraria montana</i> var. <i>lobata</i> | US 2 | USA | Tennessee      | A.N. Egan 12-146 | E1771 | 36.20035 | -87.03303 |
| <i>Pueraria montana</i> var. <i>lobata</i> | US 3 | USA | Alabama        | A.N. Egan 12-46  | E1006 | 32.38232 | -86.29362 |
| <i>Pueraria montana</i> var. <i>lobata</i> | US 3 | USA | Alabama        | A.N. Egan 12-55  | E1015 | 32.38127 | -86.29612 |
| <i>Pueraria montana</i> var. <i>lobata</i> | US 3 | USA | Alabama        | A.N. Egan 12-27  | E987  | 30.44902 | -84.25945 |
| <i>Pueraria montana</i> var. <i>lobata</i> | US 3 | USA | Alabama        | A.N. Egan 12-30  | E990  | 31.4267  | -85.61927 |
| <i>Pueraria montana</i> var. <i>lobata</i> | US 3 | USA | Alabama        | A.N. Egan 12-35  | E995  | 31.79347 | -85.97623 |
| <i>Pueraria montana</i> var. <i>lobata</i> | US 3 | USA | Georgia        | A.N. Egan 12-09  | E969  | 31.81057 | -81.36548 |
